# Supplementary material
Source: PubMed Central journal article supplement (PMC1458644)

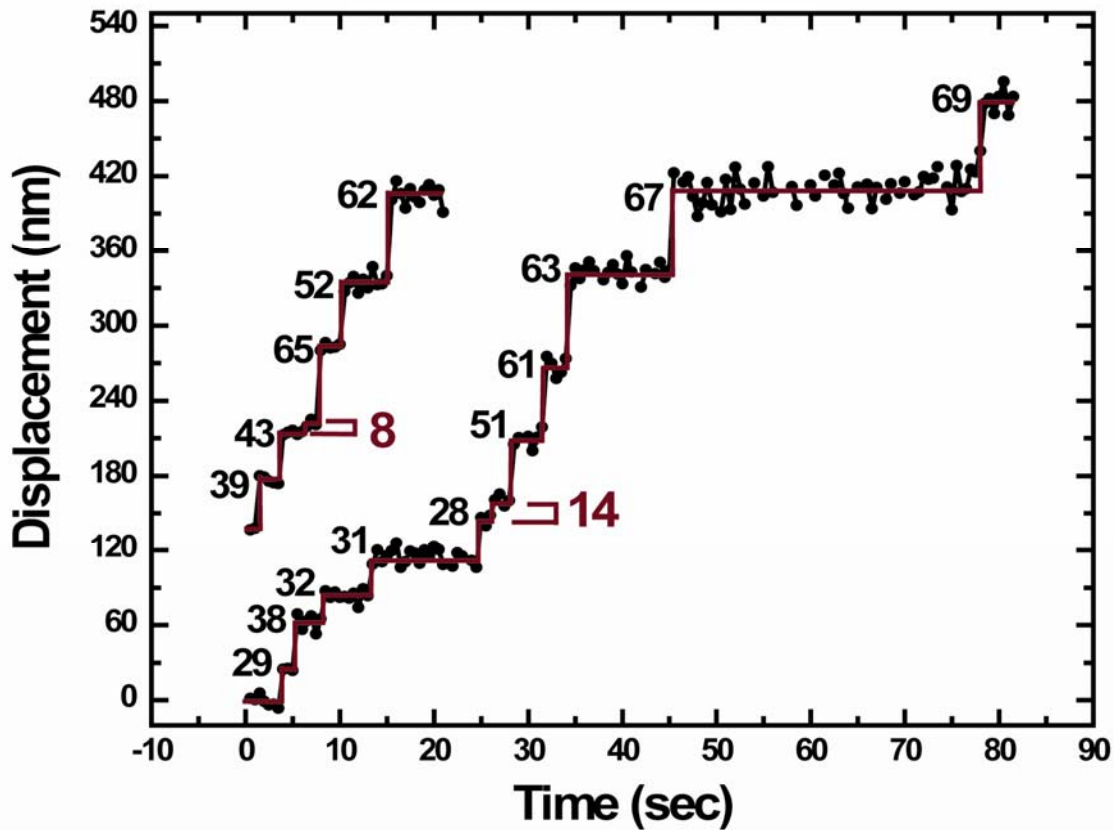

Supplement: pnas_0509935103_1.pdf [file pnas_0509935103_1.pdf]
